# Supplementary material
Source: MDPI journal article supplement (https://www.mdpi.com/2073-4352/6/9/106)

# Supplementary Materials: Packing of Helices: Is Chirality the Highest Crystallographic Symmetry?

Romain Gautier and Kenneth R. Poeppelmeier

## Experimental Details

**Synthesis.** Hydrofluoric acid is toxic and corrosive! It must be handled with extreme caution and the appropriate protective gear [1–3].

The compounds were synthesized by hydrothermal method with similar amount of starting materials. A mixture of  $M_2O_5$  ( $M = Nb^{5+}$  or  $Ta^{5+}$ ) (0.75 mmol, Aldrich 99.99%), ZnO (1.67 mmol, Alpha Aesar 99.99%), 2,2'-bipyridine (2.56 mmol, Aldrich 99%), deionized water (5.5 mmol) and 48% aqueous HF (27.8 mmol, Aldrich) was placed in a Teflon pouch.[4] The pouches were placed into a 125 mL Parr autoclave with a backfill of 45 mL distilled water. The autoclave was heated to 150°C for 24 h and slowly cooled to room temperature at 6 °C/h. Single-crystals were recovered by vacuum filtration.

**X-Ray diffraction.** Single crystal diffraction experiments were conducted at 100K using a Bruker-APEX II CCD diffractometer with monochromated Mo  $K\alpha$  radiation ( $\lambda = 0.71073 \text{ \AA}$ ). The crystal-to-detector distance was 60 mm and data integrations were made using SAINT-PLUS program [5]. Absorption corrections have been processed using SADABS [6]. The structures were determined by means of direct methods and completed by Fourier difference syntheses using SIR97 [7] and then refined using SHELXL-97 [8]. Additional symmetry elements were checked using the program PLATON [9]. Anisotropic displacement parameters were refined using SHELXL-97. Hydrogen atoms of 2,2'-bipyridine molecules were constrained to ride at distances of 0.93 Å from the associated C atoms with  $U_{iso}(H) = 1.5U_{eq}(C)$ . Crystallographic data are reported in Table S1. A twinning which was identified to not be racemic was considered with the twin law  $R = (-1-10, 010, 00-1)$ . The two materials  $[Zn(2,2'-bipy)_3](NbF_6)_2$  and  $[Zn(2,2'-bipy)_3](TaF_6)_2$  are isostructural and each of them crystallize into two enantiomers:  $P3_1$  and  $P3_2$ .

In compounds **I-II**, the helices do not exhibit any perpendicular 2-axis and are, consequently, polar (Additional symmetry elements of helices were checked with the program PLATON). The two polar structures result from the alignment of the polar helices along the  $c$  axis. The polarity in the structures can be visualized by the alignment of net dipole moment induced by the slight distortion of  $[MF_6]^-$  octahedra (Figure S1).

**Table S1.** Crystal data and summary of data collections, structure solutions and refinements for compounds  $[Zn(2,2'-bpy)_3](NbF_6)_2$  (space-group  $P3_1$ ) (I) and  $[Zn(2,2'-bpy)_3](TaF_6)_2$  (space-group  $P3_1$ ) (II).

|                                     | $[Zn(2,2'-bpy)_3](NbF_6)_2$ | $[Zn(2,2'-bpy)_3](TaF_6)_2$ |
|-------------------------------------|-----------------------------|-----------------------------|
| Space group                         | $P3_1$                      | $P3_1$                      |
| $a$ (Å)                             | 10.4782(4)                  | 10.4872(3)                  |
| $c$ (Å)                             | 26.5334(10)                 | 26.5498(8)                  |
| $V$ (Å <sup>3</sup> )               | 2522.88(17)                 | 2528.78(13)                 |
| $T$ (°K)                            | 100                         | 100                         |
| $Z$                                 | 3                           | 3                           |
| Maximum $\theta$                    | 36.4°                       | 30.8°                       |
| $\lambda$ Mo $K\alpha$ (Å)          | 0.71073                     | 0.71073                     |
| $\rho_{calc}$ (g·cm <sup>-3</sup> ) | 1.871                       | 2.214                       |
| $R_{int}$                           | 0.019                       | 0.032                       |
| $R_1$                               | 0.022                       | 0.034                       |
| $wR_2$                              | 0.053                       | 0.048                       |
| Goodness-of-fit                     | 1.04                        | 1.02                        |
| Flack parameter                     | 0.020(8)                    | 0.054(8)                    |

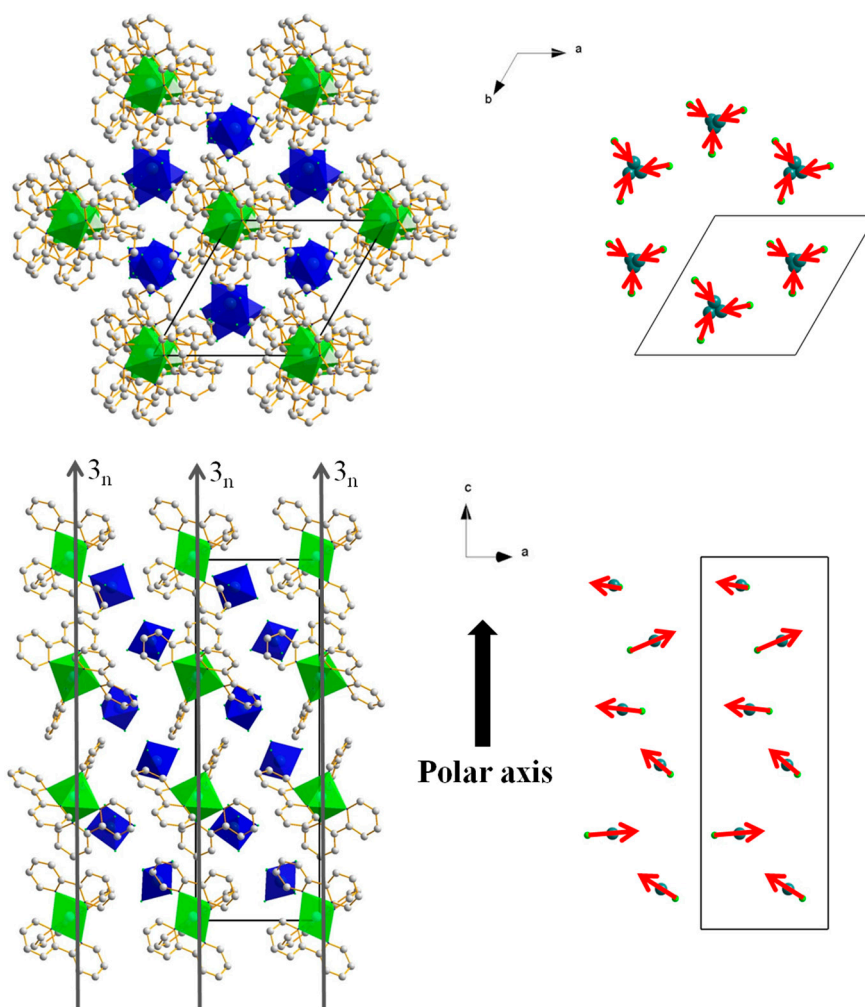

**Figure S1.** View along  $c$  and  $b$  of the structure with the relative orientation of the distortion represented by the shortest Nb-F bond. Along  $a$  and  $b$  axes, the individual dipole moments are canceled by the  $3_n$  screw axis along  $c$ . The alignment of the individual polarizations is collinear to the polar axis of the structure.

## References

1. Peters, D.; Miethchen, R. Symptoms and treatment of hydrogen fluoride injuries. *J. Fluorine Chem.* **1996**, *79*, 161–165.
2. Bertolini, J.C. Hydrofluoric acid: A review of toxicity. *J. Emerg. Med.* **1992**, *10*, 163–168.
3. Segal, E.B. First aid for a unique acid, HF: A sequel. *Chem. Health Saf.* **2000**, *7*, 18–23.
4. Harrison, W.T.A.; Nenoff, T.M.; Gier, T.E.; Stucky, G.D. Tetrahedral-atom 3-ring groupings in 1-dimensional inorganic chains: Beryllium arsenate hydroxide hydrate ( $\text{Be}_2\text{AsO}_4\text{OH}\cdot 4\text{H}_2\text{O}$ ) and sodium zinc hydroxide phosphate hydrate ( $\text{Na}_2\text{ZnPO}_4\text{OH}\cdot 7\text{H}_2\text{O}$ ). *Inorg. Chem.* **1993**, *32*, 2437–2441.
5. Brucker. *SAINT-Plus*; version 6.02A; Brucker Analytical X-ray Instruments Inc: Madison, WI USA, 2000.
6. Sheldrick, G.M. *SADABS*; University of Göttingen: Göttingen, Germany, 2002.
7. Altomare, A.; Burla, M.C.; Camalli, M.; Cascarano, G.L.; Giacovazzo, C.; Guagliardi, A.; Moliterni, A.G.G.; Polidori, G.; Spagna, R. *SIR97*: A new tool for crystal structure determination and refinement. *J. Appl. Crystallogr.* **1999**, *32*, 115–119.
8. Sheldrick, G. A short history of *SHELX*. *Acta Crystallogr. A* **2008**, *64*, 112–122.
9. Spek, A.L. *PLATON*; Utrecht University: Utrecht, The Netherlands, 2001.

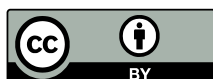

Supplement: s1 [file s1]
